# Supplementary material for: Estimation of effective anisotropy constant distribution of magnetic nanoparticles based on magnetic particle spectroscopy
Source: Royal Society of Chemistry journal article supplement (doi:10.1039/d5na00654f), 2025-01-01
Supplement: d5na00654f1.pdf [file d5na00654f1.pdf]

### Electronic Supplementary Information

#### **Estimation of effective anisotropy constant distribution of magnetic nanoparticles based on magnetic particle spectroscopy**

Haochen Zhang,<sup>a</sup> Yi Sun,<sup>a</sup> Haozhe Wang,<sup>a</sup> Zhongzhou Du,<sup>b</sup> Teruyoshi Sasayama,<sup>a</sup> and Takashi Yoshida<sup>a</sup>

<sup>a</sup> *Department of Electrical and Electronic Engineering, Kyushu University, Fukuoka, Japan.*

<sup>b</sup> *School of Computer and Communication Engineering, Zhengzhou University of Light Industry, Zhengzhou, China.*

*\*To whom correspondence should be addressed. E-mail: zhang.haochen.048@s.kyushu-u.ac.jp*

### AC $M$ - $H$ curves obtained by MPS

The AC  $M$ - $H$  curves of the solidified samples were measured at room temperature using magnetic particle spectroscopy (MPS) under an AC excitation field with an amplitude of  $\mu_0 H_{ac} = 10 \text{ mT}$  and the frequencies ranging from  $f = 1$  to 20 kHz.

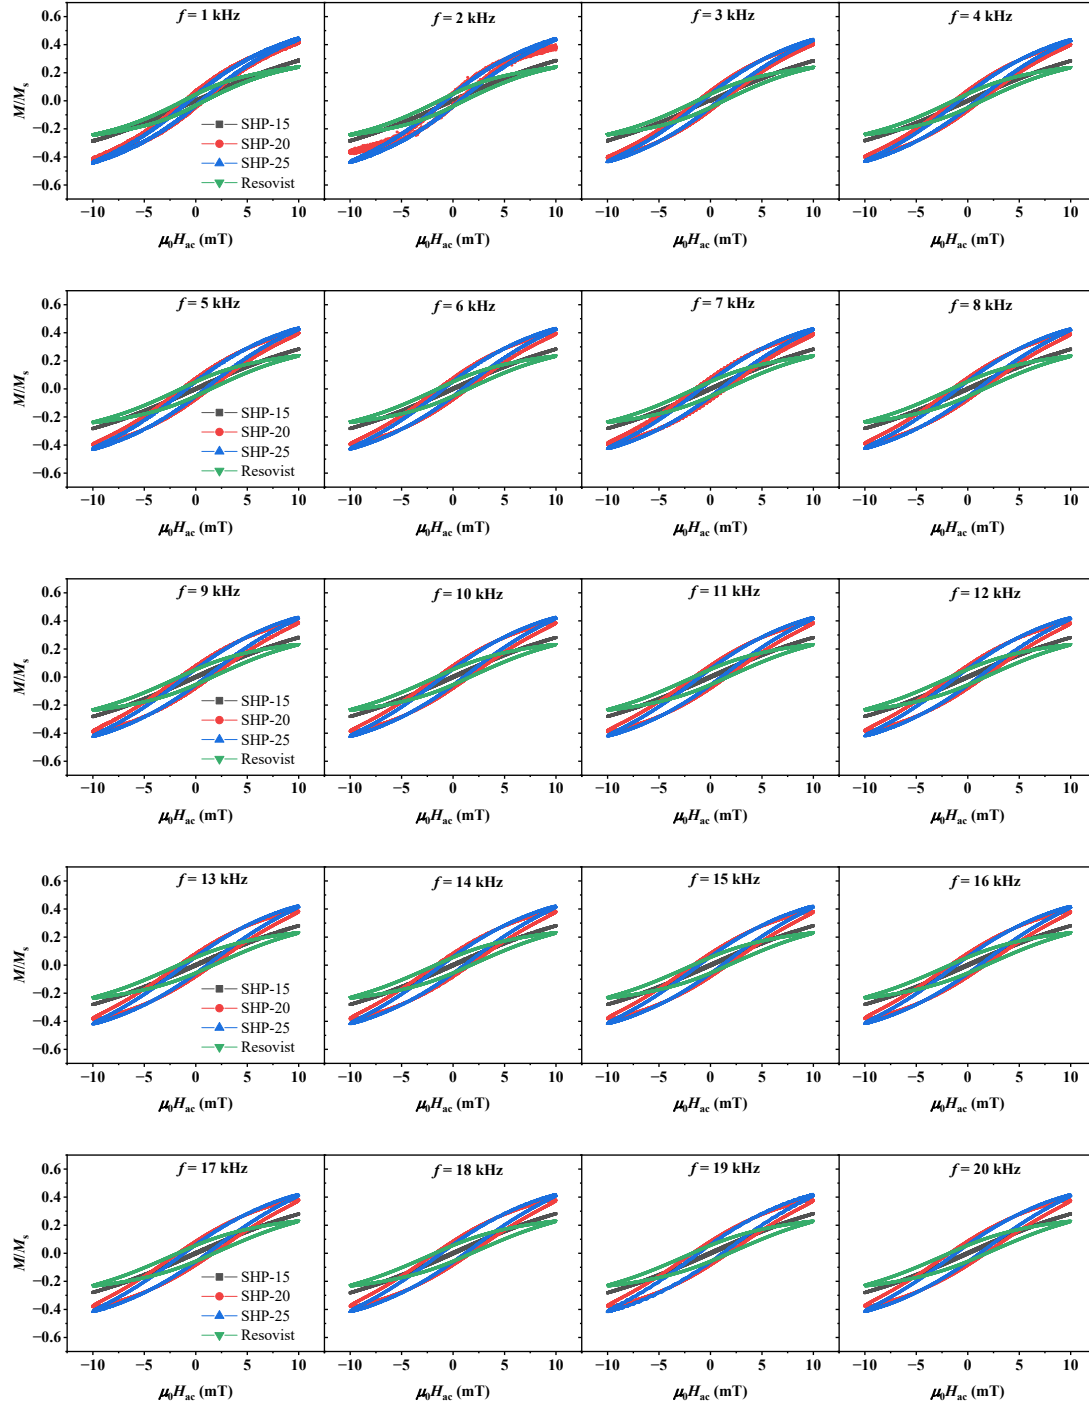

**Fig. S1** AC  $M$ - $H$  curves of four MNP samples.



### Core size distribution estimated from static $M-H$ curve obtained by VSM

The saturation magnetizations  $M_s$  of samples were measured from the static  $M-H$  curves using VSM. The obtained values of  $M_s$  at  $T = 300\text{ K}$  were  $M_s = 353.42\text{ kA/m}$  (SHP-15),  $268.0\text{ kA/m}$  (SHP-20),  $185.48\text{ kA/m}$  (SHP-25),  $295.45\text{ kA/m}$  (Resovist), and  $282.95\text{ kA/m}$  (MS3), respectively.

The core size distribution  $n_{dc,v}(d_c)$  was estimated by analysing the static  $M-H$  curve. Detail cprocedures can be found in Refs [1] and [2]. Figs S2 and S3 show the core size distribution of samples. The main core diameters  $d_{c\_main}$  of SHP-15, SHP-20, and SHP-25 are around 15 nm, 20 nm, and 20 nm, respectively. For Resovist, the core size distribution exhibits two main peaks: the smaller  $d_{c\_main}$  around 8 nm corresponds to single core MNPs, while the larger  $d_{c\_main}$  around 23 nm, represents to multi-core MNPs. For MS3, in which particles larger than 20 nm were largely removed from Resovist,  $d_{c\_main}$  is approximately 8 nm.

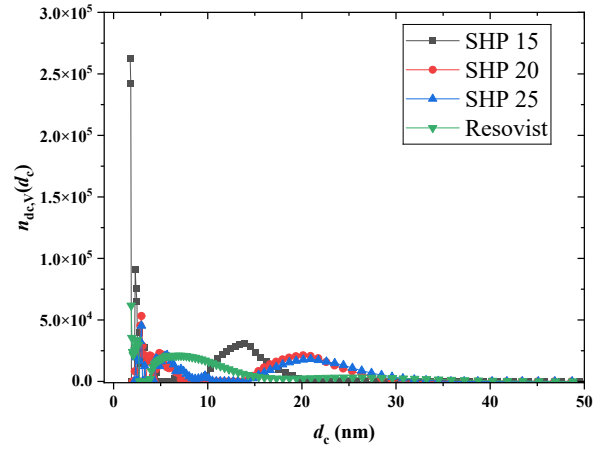

**Fig. S2** Volume-weighted number density of MNPs having  $d_c$ ,  $n_{dc,v}(d_c)$ , of SHP-15, SHP-20, SHP-25, and Resovist.

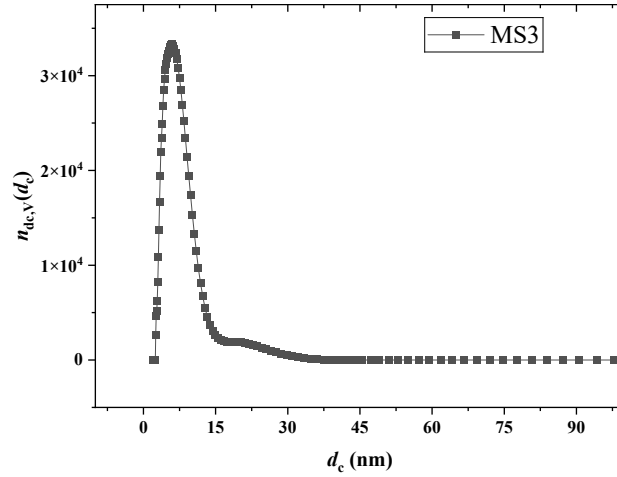

**Fig. S3** Volume-weighted number density of MNPs having  $d_c$ ,  $n_{dc,v}(d_c)$ , of MS3.

#### Hydrodynamic size distribution estimated by DLS

The hydrodynamic size  $d_h$  of samples were measured using dynamic light scattering (DLS). The main hydrodynamic sizes  $d_{h\_main}$  are approximately 43 nm, 50 nm, 55 nm and 70 nm for SHP-15, SHP-20, SHP-25 and Resovist, respectively. The SHP samples exhibit relatively narrow and monomodal distributions, indicating uniform dispersion of nanoparticles in aqueous solution. In contrast, Resovist shows a broader and more dispersed  $d_h$  distribution which can be attributed to the presence of two  $d_c$  peak in core size distribution.

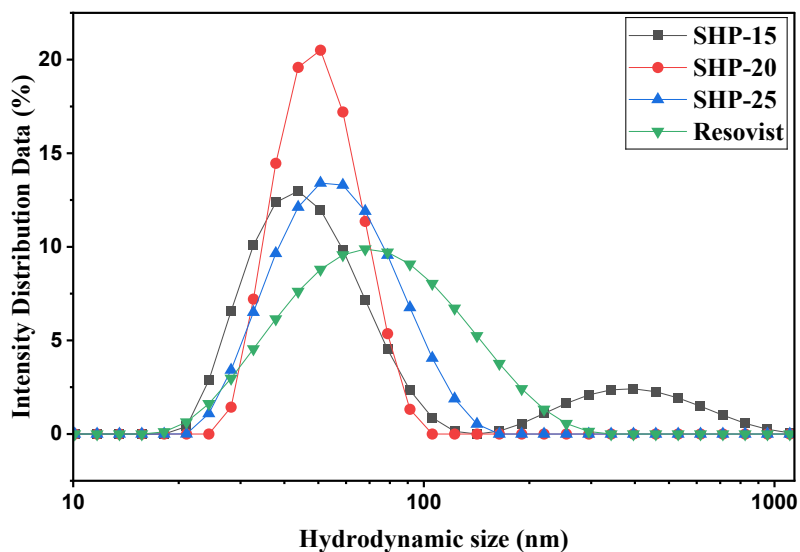

**Fig. S4** Hydrodynamic size distribution of SHP-15, SHP-20, SHP-25, and Resovist estimated by DLS.

**Table S1** Comparison between the main core size ( $d_{c\_main}$ ) and main hydrodynamic size ( $d_{h\_main}$ ) obtained from VSM and DLS measurements for SHP-15, SHP-20, SHP-25, and Resovist.

*Note:* Resovist exhibits two peaks in its core size distribution, corresponding to  $d_{c\_main} \approx 8$  nm and 23 nm.

| Sample   | $d_{c\_main}$ [nm] | $d_{h\_main}$ [nm] |
|----------|--------------------|--------------------|
| SHP-15   | 15                 | 43                 |
| SHP-20   | 20                 | 50                 |
| SHP-25   | 20                 | 55                 |
| Resovist | 8 and 23           | 70                 |

### TEM images of MS3 and SHP-20

Transmission electron microscopy (TEM) observation was performed using a JEOL 2100F system (JEOL Ltd., Japan) operated at an accelerating voltage of 200 kV.

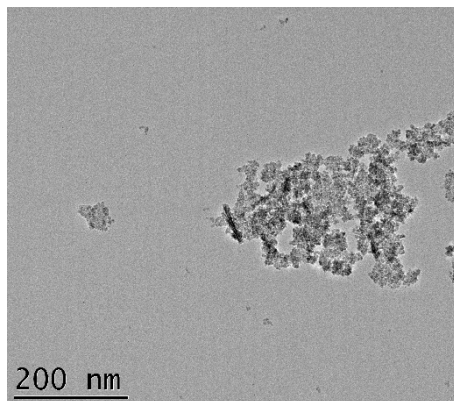

**Fig. S5** TEM image of Resovist.

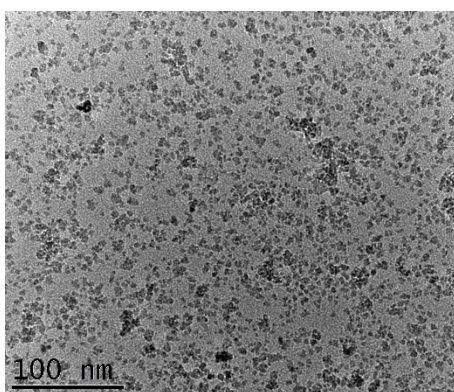

**Fig. S6** TEM image of MS3.

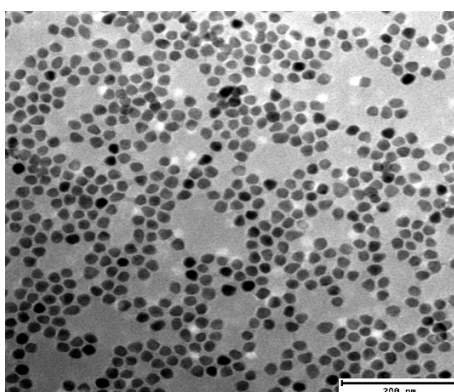

**Fig. S7** TEM image of SHP20.

AC  $M$ - $H$  curves of SHP-15, SHP-25, and Resovist

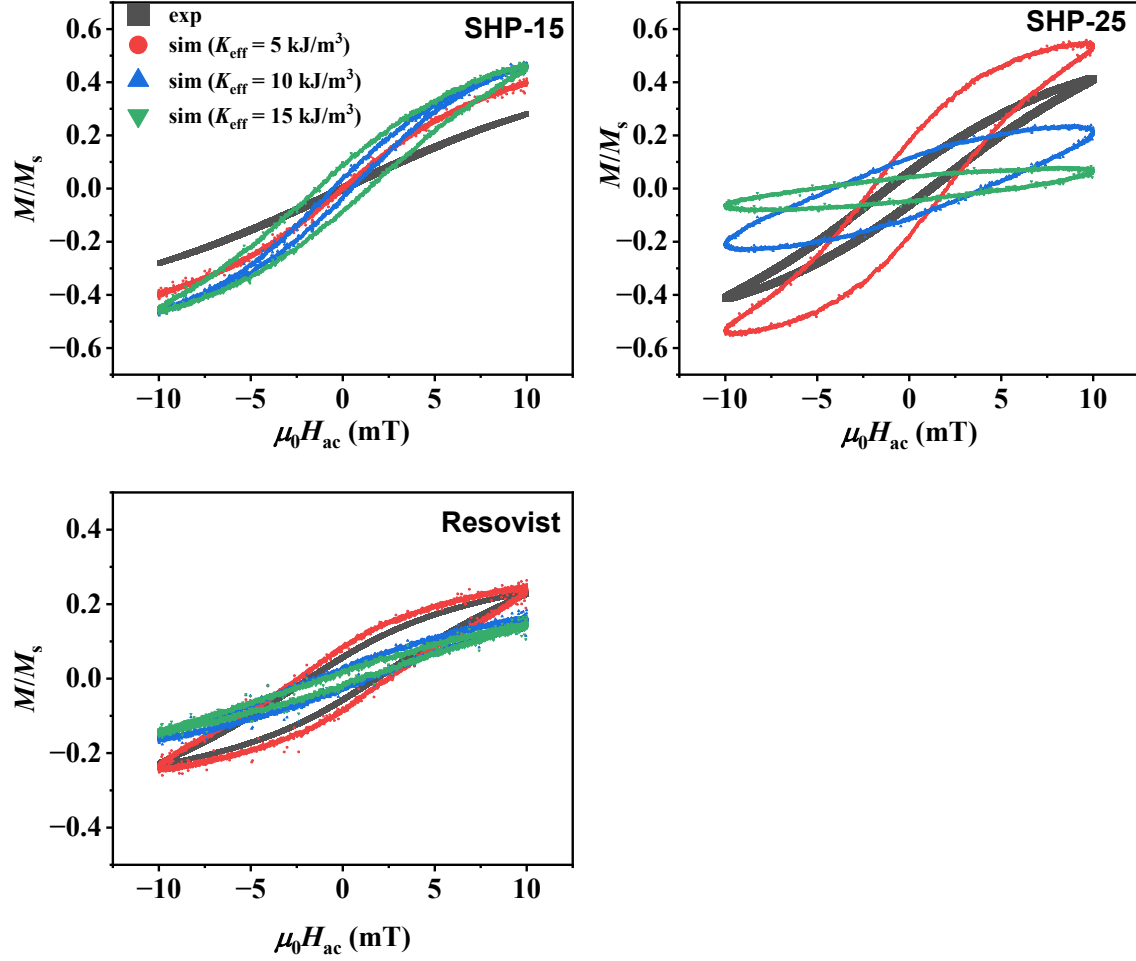

**Fig. S8** Comparison between the experimental and simulation results of AC  $M$ - $H$  for SHP-15, SHP-25, and Resovist under an excitation field amplitude of  $\mu_0 H_{ac} = 10$  mT and a frequency of 20 kHz. In the simulations, the effective anisotropy constant  $K_{eff}(d_c^I)$  is set to a constant value and changed from 5 – 15 kJ/m<sup>3</sup>.

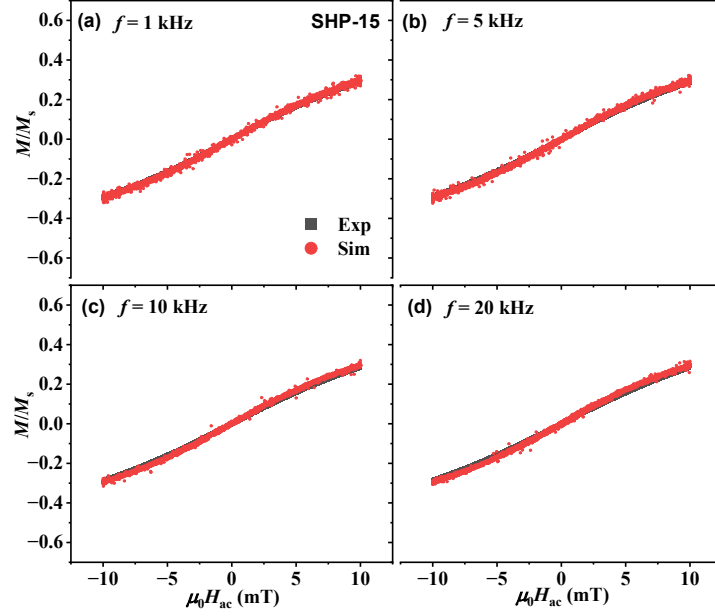

**Fig. S9** Comparison between the experimental and simulation results of AC  $M$ - $H$  for SHP-15 sample under an excitation field amplitude of  $\mu_0 H_{ac} = 10 \text{ mT}$  and a frequency of (a) 1 kHz, (b) 5 kHz, (c) 10 kHz, and (d) 20 kHz, respectively. In the simulations, the estimated  $K_{eff}$  distribution, which is obtained from eqn (12), is used.

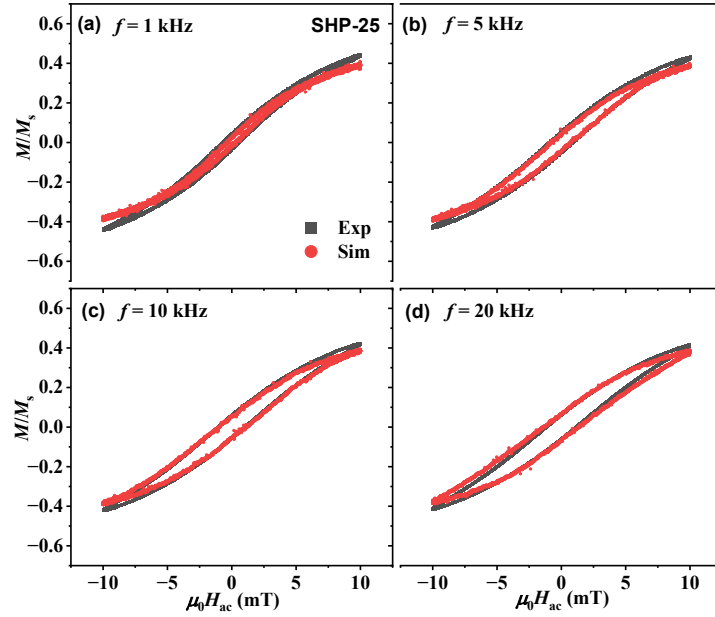

**Fig. S10** Comparison between the experimental and simulation results of AC  $M$ - $H$  for SHP-25 sample under an excitation field amplitude of  $\mu_0 H_{ac} = 10 \text{ mT}$  and a frequency of (a) 1 kHz, (b) 5 kHz, (c) 10 kHz, and (d) 20 kHz, respectively. In the simulations, the estimated  $K_{eff}$  distribution, which is obtained from eqn (12), is used.

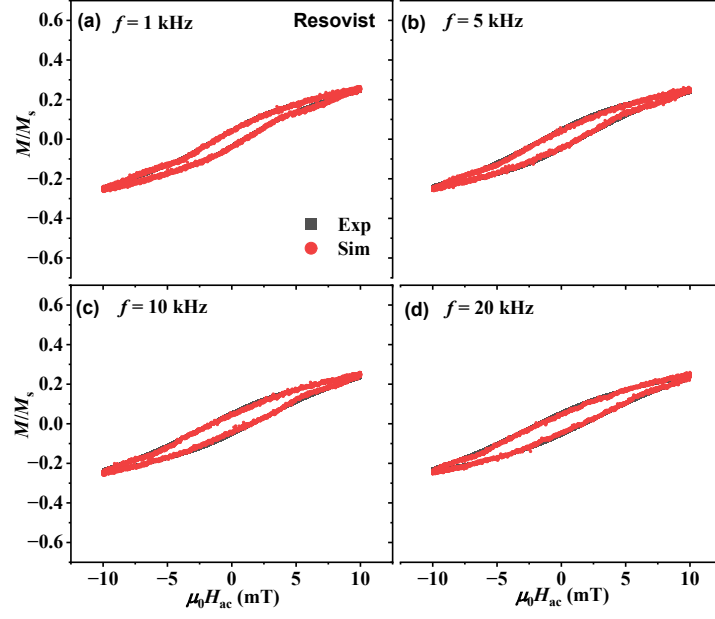

**Fig. S11** Comparison between the experimental and simulation results of AC  $M$ - $H$  for Resovist sample under an excitation field amplitude of  $\mu_0 H_{ac} = 10$  mT and a frequency of (a) 1 kHz, (b) 5 kHz, (c) 10 kHz, and (d) 20 kHz, respectively. In the simulations, the estimated  $K_{eff}$  distribution, which is obtained from eqn (12), is used.

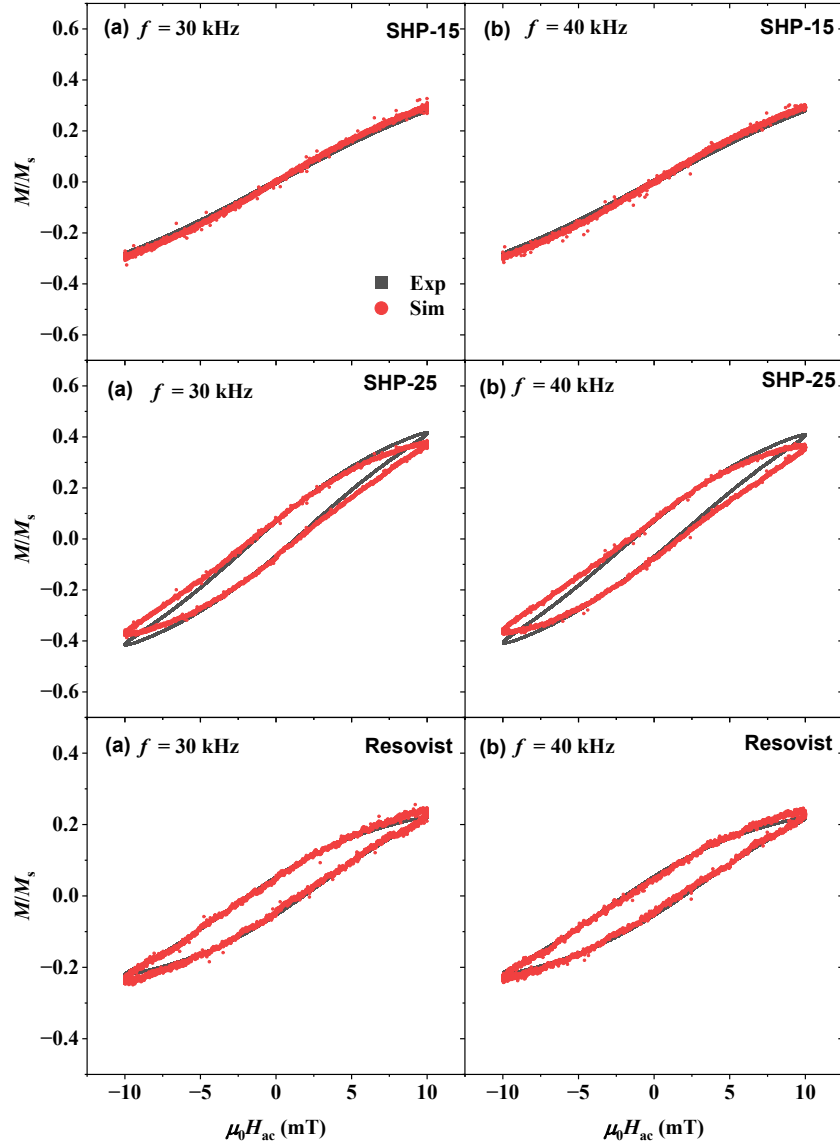

**Fig. S12** Comparison between the experimental and simulation results of AC M-H for SHP-15, SHP-25, and Resovist samples under an excitation field amplitude of  $\mu_0 H_{ac} = 10 \text{ mT}$  and a frequency of (a) 30 kHz and (b) 40 kHz, respectively. In the simulations, the estimated  $K_{eff}$  distribution, which is obtained from eqn (12), is used.

$K_{eff}$  around  $d_{c\_main}$

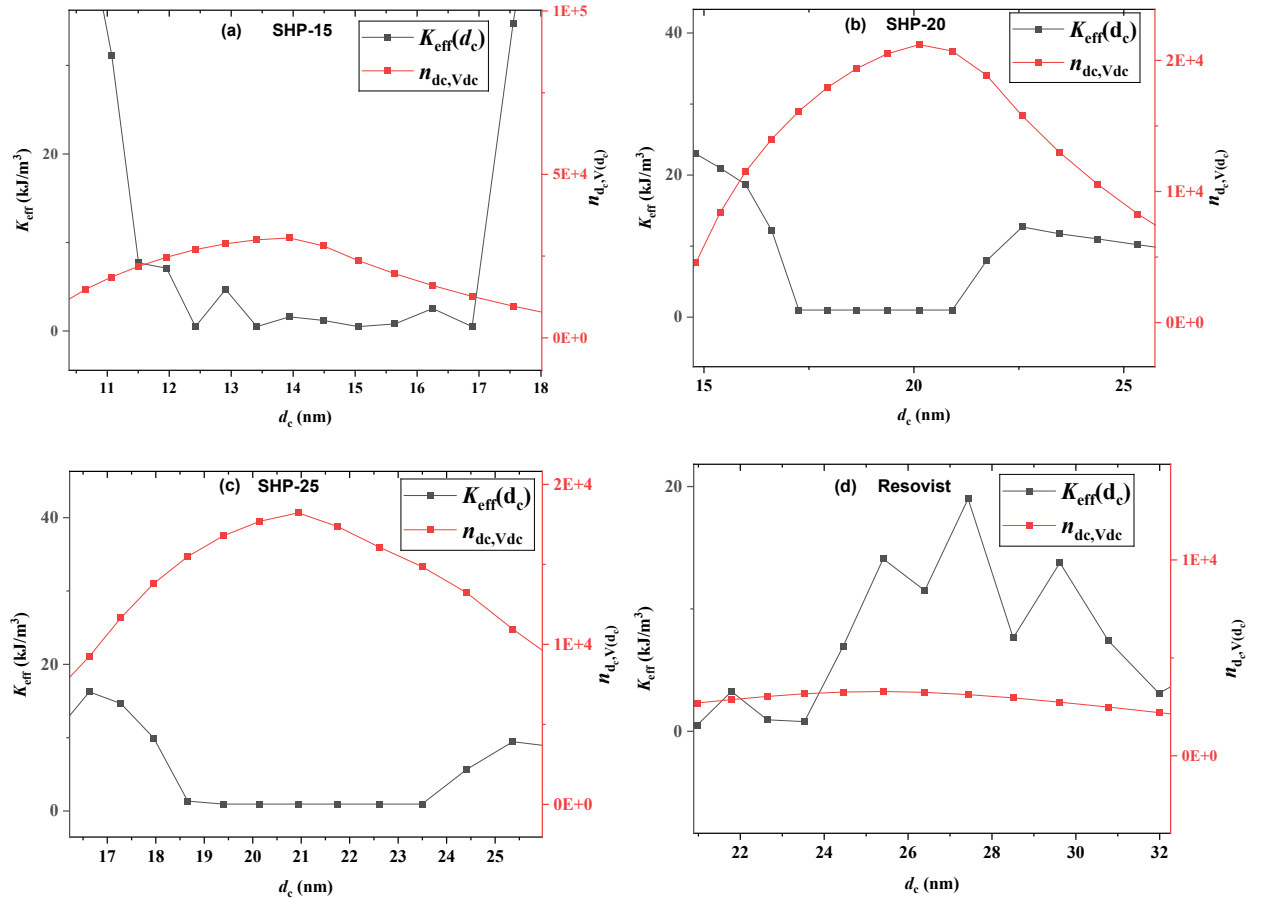

**Fig. S13** A partial enlarged view of Figure 4(a-d), when  $d_c$  around  $d_{c\_main}$ .



## Comparison between the experimental and simulation results of hysteresis loop area

$$A = -\frac{\mu_0}{M_s - H_{ac}} \int_{H_{ac}}^{H_{ac}} M dH \quad (S1)$$

**Table S2** Comparison between the experimental and simulation results of hysteresis loop area  $A$ , for SHP-15, SHP-20, SHP-25, and Resovist, under an excitation field amplitude of  $\mu_0 H_{ac} = 10 \text{ mT}$  and a frequency  $f$  of 30 kHz and 40 kHz. Hysteresis loop area  $A$  is calculated by eqn (S1). In the simulations, the estimated  $K_{eff}$  distribution, which is obtained from eqn (12), is used.

| Sample   | $A_{\text{exp}} (f = 30 \text{ kHz})$<br>[arb unit] | $A_{\text{sim}} (f = 30 \text{ kHz})$<br>[arb unit] | $A_{\text{exp}} (f = 40 \text{ kHz})$<br>[arb unit] | $A_{\text{sim}} (f = 40 \text{ kHz})$<br>[arb unit] |
|----------|-----------------------------------------------------|-----------------------------------------------------|-----------------------------------------------------|-----------------------------------------------------|
| SHP-15   | 0.17564                                             | 0.1525                                              | 0.18965                                             | 0.22574                                             |
| SHP-20   | 2.65218                                             | 2.64797                                             | 2.71673                                             | 2.88557                                             |
| SHP-25   | 1.72174                                             | 2.07473                                             | 1.80636                                             | 2.27716                                             |
| Resovist | 1.30608                                             | 1.27624                                             | 1.35836                                             | 1.36283                                             |

## References

1. K. Enpuku, T. Sasayama, T. Yoshida, *J. Appl. Phys.* 2016, **119** (18), 184902.
2. J. V. Rijssel, B. W.M. Kuipers, B. H. Ern , *J. Magn. Magn. Mater*, 2014, **353**, 110-115,
